# Supplementary material for: Purification of anti-glycoconjugate monoclonal antibodies using newly developed porous zirconia particles
Source: PubMed Central journal article supplement (PMC7873262; doi:10.1038/s41598-021-82457-0), 2021-02-09
Supplement: 41598_2021_82457_MOESM1_ESM.pdf [file 41598_2021_82457_MOESM1_ESM.pdf]

# **Purification of anti-glycoconjugate monoclonal antibodies using newly developed porous zirconia particles**

Tetsuya Okuda<sup>1\*</sup>, Katsuya Kato<sup>2</sup>,  
Masahiro Kitamura<sup>2</sup> & Shinjiro Kasahara<sup>3</sup>

1. Bioproduction Research Institute, National Institute of Advanced Industrial Science and Technology (AIST), Central 6, 1-1-1 Higashi, Tsukuba 305-8566, Japan.

2. NGK Spark Plug-AIST Healthcare·Materials Cooperative Research Laboratory, National Institute of Advanced Industrial Science and Technology (AIST) , 2266-98 Anagahora, Shimoshidami, Moriyama-ku, Nagoya 463-8560, Japan

3. NGK Spark Plug Co., Ltd., 2808 Iwasaki, Komaki, Aichi 485-8510, Japan.

## **Supplementary Information**

Supplemental Figure S1

Supplemental Figure S2

Supplemental Figure S3

Supplemental Table S1

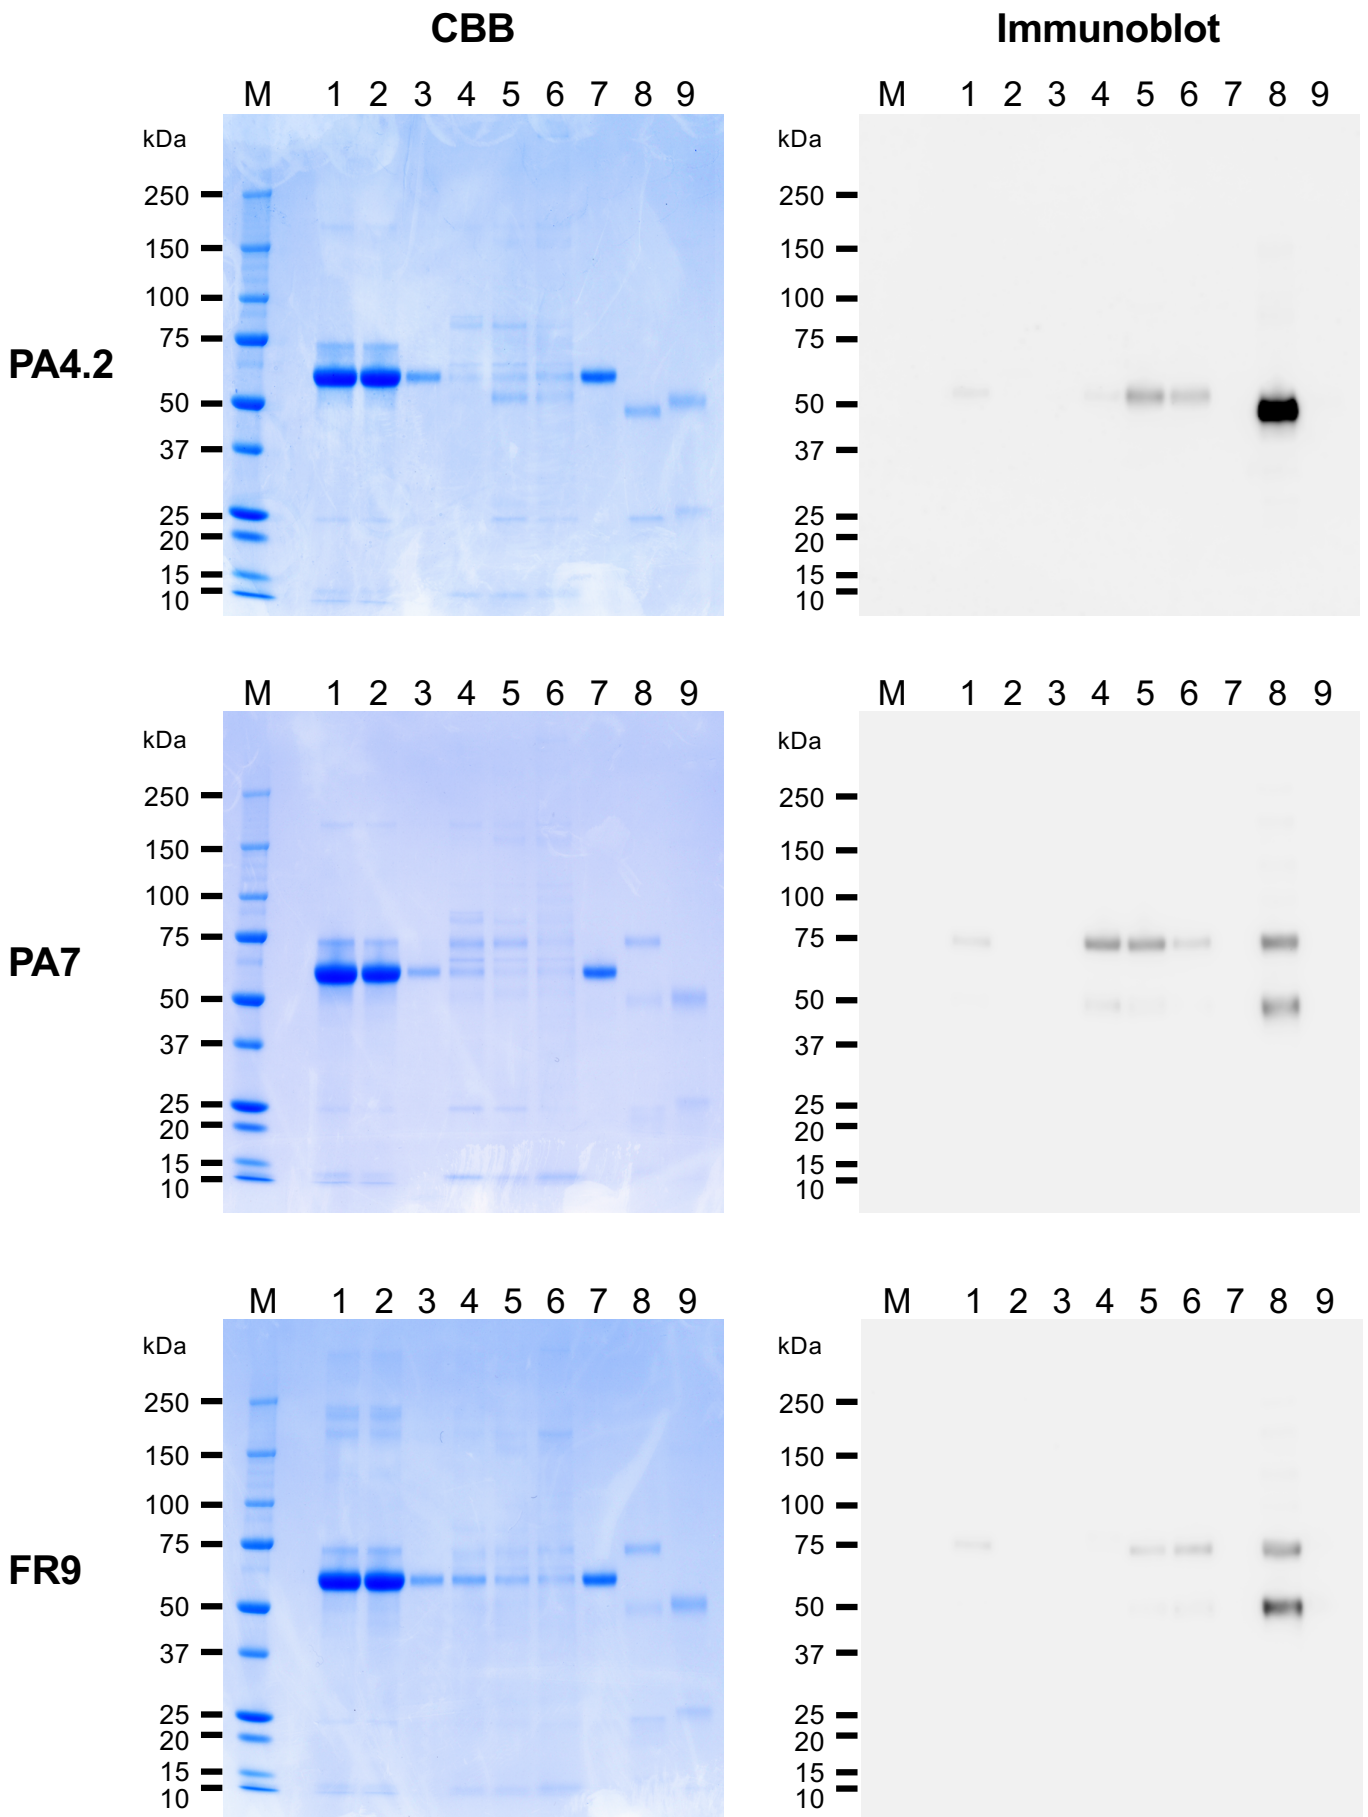

**Figure S1.** SDS-PAGE analysis of PZP-purified monoclonal antibodies.

Upper panels, PA4.2 IgG3; middle panels, PA7 IgM; bottom panels, FR9 IgM. Left panels, CBB staining; right panels, immunoblotting. Lane 1, hybridoma supernatant; 2, non-adsorbed fraction; 3, wash fraction; 4, 100 mM PB-eluted fraction; 5, 200 mM PB-eluted fraction; 6, 500 mM PB-eluted fraction; 7, standard BSA; 8, standard mouse IgG3 (for PA4.2) or IgM (for PA7 or FR9); 9, standard bovine IgG.

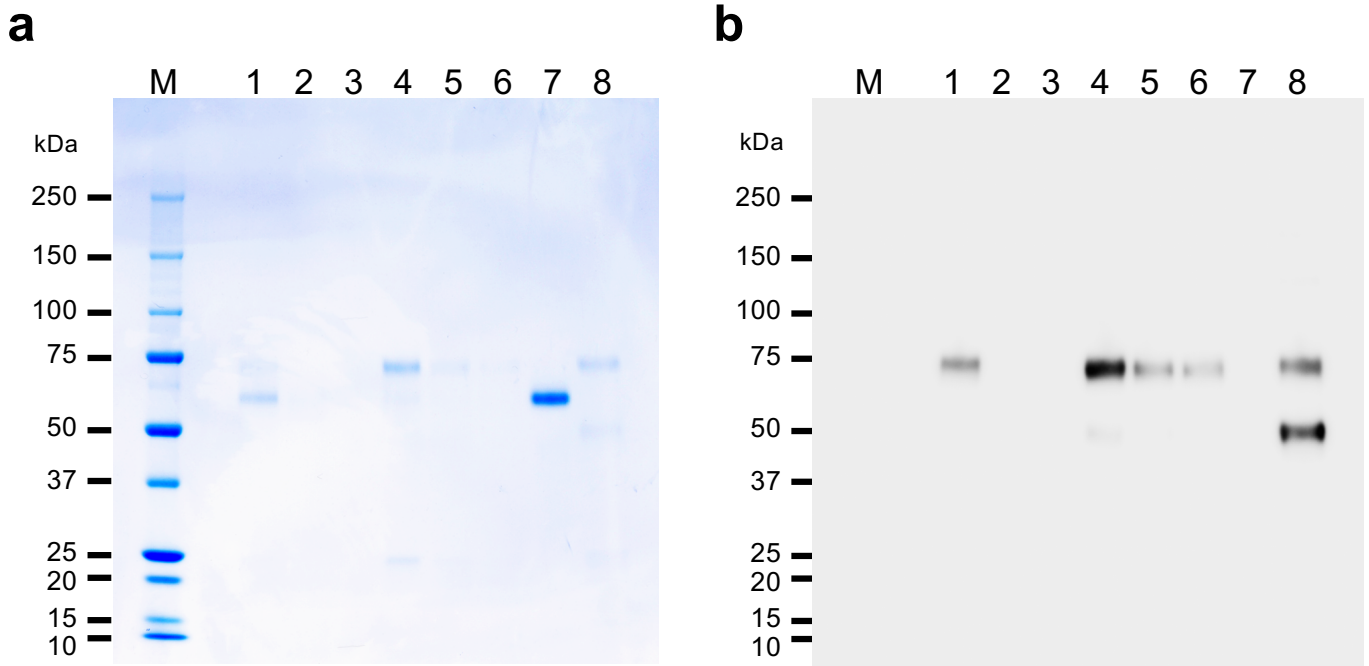

**Figure S2.** SDS-PAGE analysis of IgM composed by  $\lambda$ -light chains after PZP purification. Ascites fluid containing monoclonal IgM composed of  $\lambda$ -light chains (MOPC104E) was diluted with 10 mM PB (pH 7.0), and 1 mL of sample containing approximately 60  $\mu$ g of these antibodies was purified using PZPs. The following PZP purification fractions were analyzed by SDS-PAGE with CBB staining (**a**) or anti-mouse IgM immunoblotting (**b**), as described in the *Methods*. Lane 1, PB-diluted ascites; 2, non-adsorbed fraction; 3, wash fraction; 4, 100 mM PB-eluted fraction; 5, 200 mM PB-eluted fraction; 6, 500 mM PB-eluted fraction; 7, standard BSA; 8, standard mouse IgM; M, molecular weight marker. The protein band detected near the 50-kDa marker in lanes 4 and 8 is a degradation product of the immunoglobulin  $\mu$ -chain.

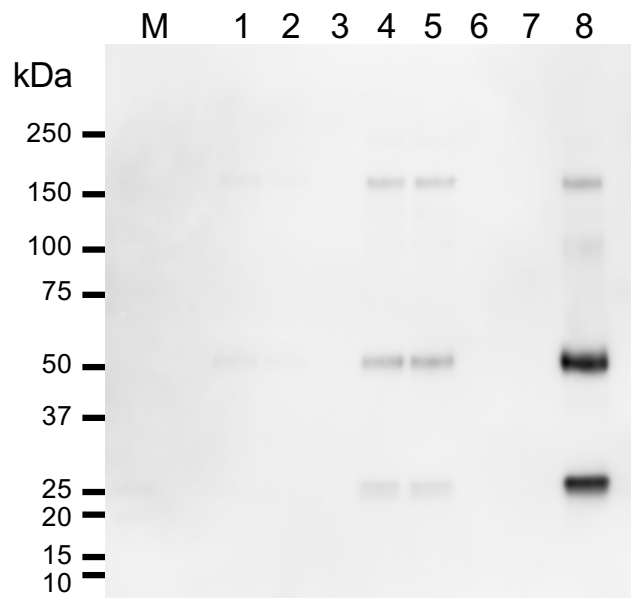

**Figure S3.** Anti-bovine IgG immunoblot analysis of PA5 purified from hybridoma supernatant using PZPs.

Bovine IgG in the SDS-PAGE sample (Fig. 2a) was detected by immunoblotting using HRP-labeled anti-bovine IgG as described in the *Methods*. Lane 1, hybridoma culture supernatant; 2, non-adsorbed fraction; 3, wash fraction; 4, 100 mM PB-eluted fraction; 5, 200 mM PB-eluted fraction; 6, standard BSA; 7, standard mouse IgM; 8, standard bovine IgG .

| Glycoconjugate                 | Structure                                                                                                |
|--------------------------------|----------------------------------------------------------------------------------------------------------|
| LacCer                         | Gal $\beta$ 1,4GlcCer                                                                                    |
| Gb3Cer                         | Gal $\alpha$ 1,4Gal $\beta$ 1,4GlcCer                                                                    |
| Gb4Cer                         | GalNAc $\beta$ 1,3Gal $\alpha$ 1,4Gal $\beta$ 1,4GlcCer                                                  |
| Gg3Cer                         | GalNAc $\beta$ 1,4Gal $\beta$ 1,4GlcCer                                                                  |
| Gg4Cer                         | Gal $\beta$ 1,3GalNAc $\beta$ 1,4Gal $\beta$ 1,4GlcCer                                                   |
| GM3                            | Sia $\alpha$ 2,3Gal $\beta$ 1,4GlcCer                                                                    |
| GM2                            | GalNAc $\beta$ 1,4(Sia $\alpha$ 2,3)Gal $\beta$ 1,4GlcCer                                                |
| GM1                            | Gal $\beta$ 1,3GalNAc $\beta$ 1,4(Sia $\alpha$ 2,3)Gal $\beta$ 1,4GlcCer                                 |
| GD1a                           | Sia $\alpha$ 2,3Gal $\beta$ 1,3GalNAc $\beta$ 1,4(Sia $\alpha$ 2,3)Gal $\beta$ 1,4GlcCer                 |
| GT1b                           | Sia $\alpha$ 2,3Gal $\beta$ 1,3GalNAc $\beta$ 1,4(Sia $\alpha$ 2,8Sia $\alpha$ 2,3)Gal $\beta$ 1,4GlcCer |
| LacNAcCerA                     | Gal $\beta$ 1,4GlcNAcCerA                                                                                |
| $\alpha$ 2,6-sialyl LacNAcCerA | Sia $\alpha$ 2,6Gal $\beta$ 1,4GlcNAcCerA                                                                |
| $\alpha$ 2,3-sialyl LacNAcCerA | Sia $\alpha$ 2,3Gal $\beta$ 1,4GlcNAcCerA                                                                |
| fetuin*                        | Sia $\alpha$ 2,6Gal $\beta$ 1,4GlcNAc                                                                    |
| asialo-fetuin*                 | Gal $\beta$ 1,4GlcNAc                                                                                    |

**Table S1.** Structures of oligosaccharides in glycoconjugates used in this study.

\*Main structures of the non-reducing terminal oligosaccharides in these glycoproteins are presented. Abbreviations: Cer, ceramide; Sia, sialic acid (Neu5Ac); CerA, ceramide analogue.
